# Supplementary material for: Photovoltaic poly(rod-coil) polymers based on benzodithiophene-centred A–D–A type conjugated segments and dicarboxylate-linked alkyl non-conjugated segments
Source: Royal Society of Chemistry journal article supplement (doi:10.1039/c6ra01200k), 2016-01-01
Supplement: c6ra01200k1.pdf [file c6ra01200k1.pdf]

## Electronic Supplementary Information

# Photovoltaic poly (rod-coil) polymers based on benzodithiophene-centred A-D-A type conjugated segments and dicarboxylate-linked alkyl non-conjugated segments

Xuan Xiang,<sup>a,b,#</sup> Wei Shao,<sup>b,#</sup> Long Liang,<sup>b</sup> Xue-Qiang Chen,<sup>a,b</sup> Fu-Gang Zhao,<sup>\*,a</sup> Zhengquan Lu,<sup>c</sup> Wenwu Wang,<sup>c</sup> Jingjing Li,<sup>c</sup> and Wei-Shi Li<sup>\*,a,b,c</sup>

<sup>a</sup> Department of Chemistry, Key Laboratory of Advanced Textile Materials and Manufacturing Technology of Education Ministry, Zhejiang Sci-Tech University, Hangzhou, Zhejiang 310018, China.

<sup>b</sup> Key Laboratory of Synthetic and Self-assembly Chemistry for Organic Functional Molecules, Shanghai Institute of Organic Chemistry, Chinese Academy of Sciences, Shanghai 200032, China.

<sup>c</sup> Engineering Research Centre of Zhengzhou for High Performance Organic Functional Materials, Zhongzhou University, 6 Yingcai Street, Huiji District, Zhengzhou 450044, China.

<sup>#</sup> These authors contributed equally.

## Contents

|                 |                                                                                                                                                           |
|-----------------|-----------------------------------------------------------------------------------------------------------------------------------------------------------|
| <b>Fig. S1</b>  | <sup>1</sup> H NMR spectrum of compound <b>1</b> .                                                                                                        |
| <b>Fig. S2</b>  | <sup>1</sup> H NMR spectrum of compound <b>2</b> .                                                                                                        |
| <b>Fig. S3</b>  | <sup>1</sup> H NMR spectrum of compound <b>3</b> .                                                                                                        |
| <b>Fig. S4</b>  | <sup>1</sup> H NMR spectrum of compound <b>4</b> .                                                                                                        |
| <b>Fig. S5</b>  | <sup>1</sup> H NMR spectrum of compound <b>5</b> .                                                                                                        |
| <b>Fig. S6</b>  | <sup>1</sup> H NMR spectrum of compound <b>6</b> .                                                                                                        |
| <b>Fig. S7</b>  | <sup>1</sup> H NMR spectrum of compound <b>7</b> .                                                                                                        |
| <b>Fig. S8</b>  | MALDI-TOF mass spectrum of compound <b>7</b> .                                                                                                            |
| <b>Fig. S9</b>  | TGA curves of <b>P1</b> , <b>P2</b> , <b>P3</b> , <b>P4</b> and <b>P5</b> .                                                                               |
| <b>Fig. S10</b> | DSC curves of <b>P1</b> , <b>P2</b> , <b>P3</b> , <b>P4</b> and <b>P5</b> .                                                                               |
| <b>Fig. S11</b> | The SCLC fitting curves of <b>P1</b> , <b>P2</b> , <b>P3</b> , <b>P4</b> and <b>P5</b> measured with a device structure of ITO/PEDTO:PSS/active layer/Au. |
| <b>Table S1</b> | Device optimization for the OSCs based on <b>P1</b> .                                                                                                     |
| <b>Table S2</b> | Device optimization for the OSCs based on <b>P2</b> .                                                                                                     |
| <b>Table S3</b> | Device optimization for the OSCs based on <b>P3</b> .                                                                                                     |
| <b>Table S4</b> | Device optimization for the OSCs based on <b>P4</b> .                                                                                                     |
| <b>Table S5</b> | Device optimization for the OSCs based on <b>P5</b> .                                                                                                     |

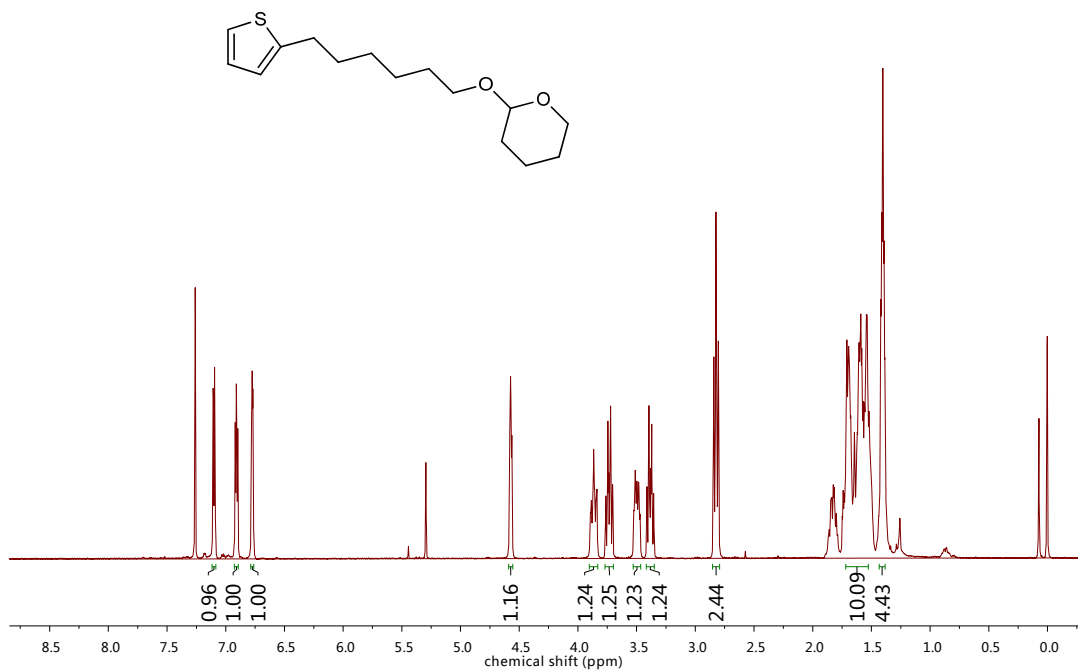

Fig. S1  $^1\text{H}$  NMR spectrum of compound 1 ( $\text{CDCl}_3$ ).

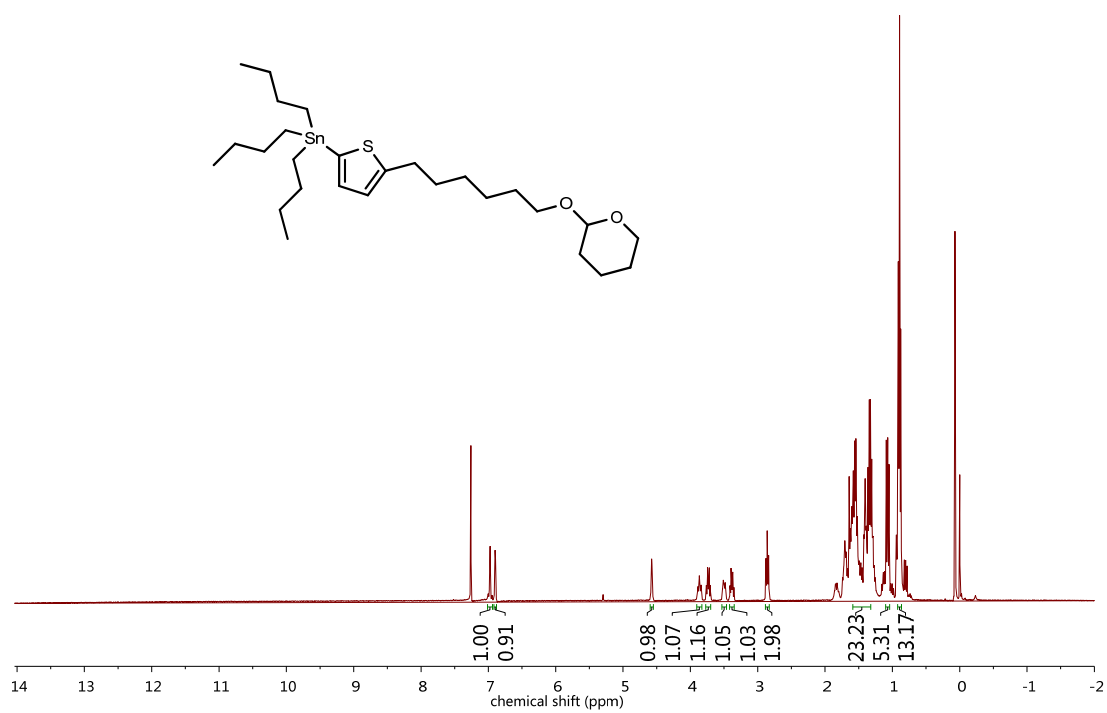

Fig. S2  $^1\text{H}$  NMR spectrum of compound 2 ( $\text{CDCl}_3$ ).

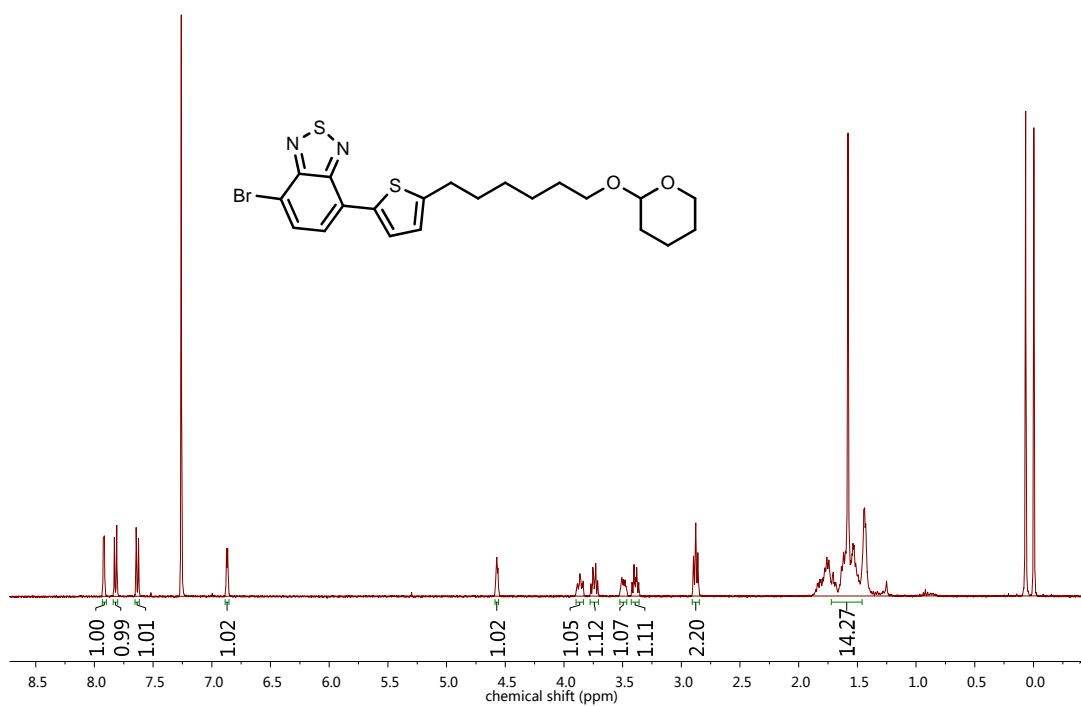

Fig. S3  $^1\text{H}$  NMR spectrum of compound 3 ( $\text{CDCl}_3$ ).

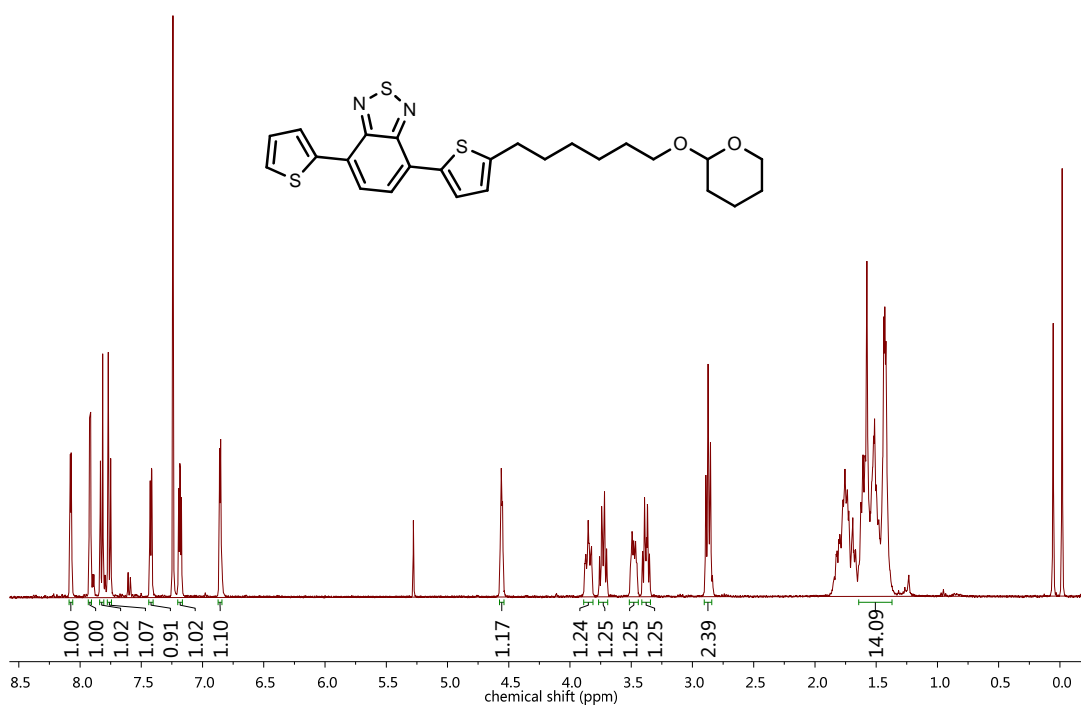

Fig. S4  $^1\text{H}$  NMR spectrum of compound 4 ( $\text{CDCl}_3$ ).

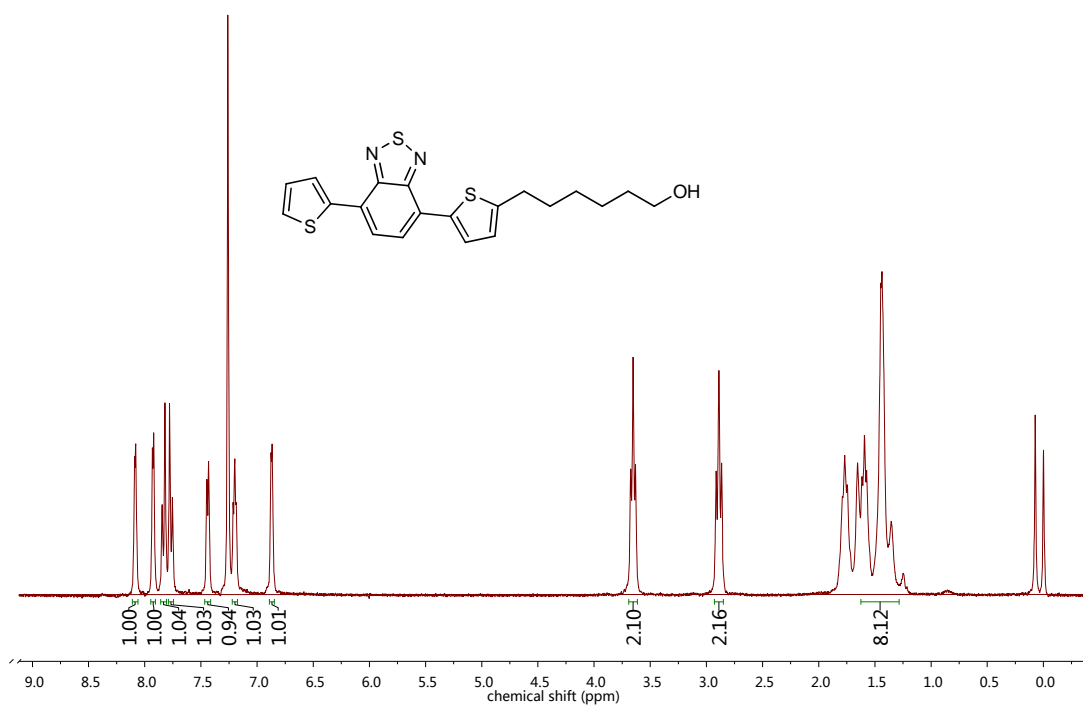

Fig. S5  $^1\text{H}$  NMR spectrum of compound 5 ( $\text{CDCl}_3$ ).

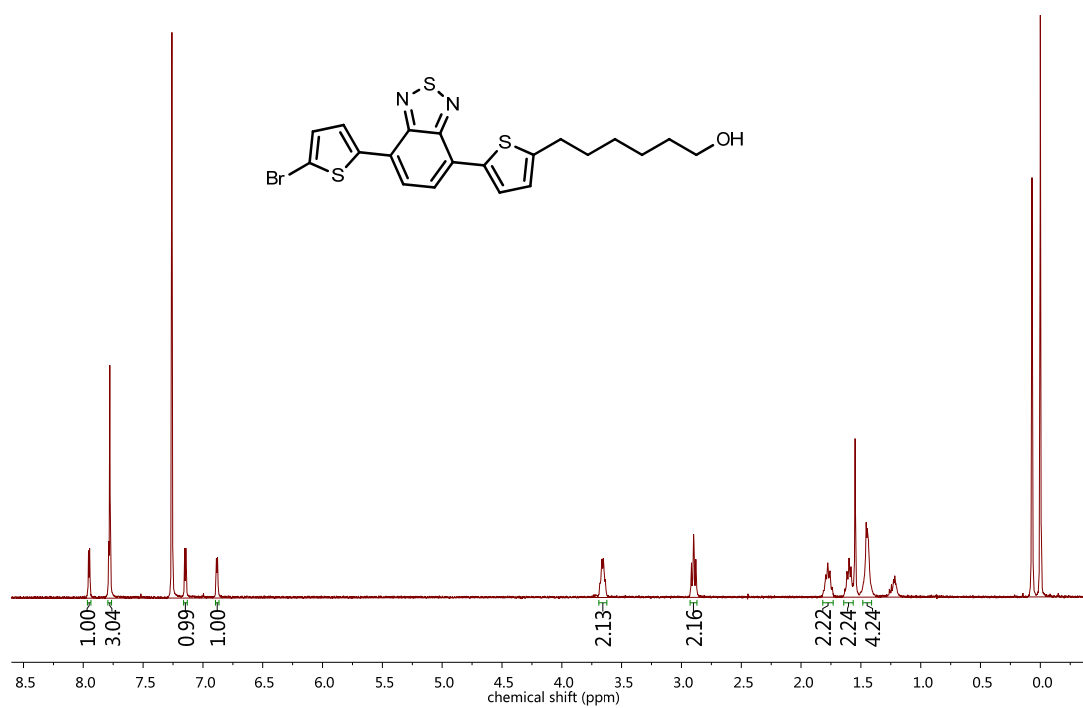

Fig. S6  $^1\text{H}$  NMR spectrum of compound 6 ( $\text{CDCl}_3$ ).

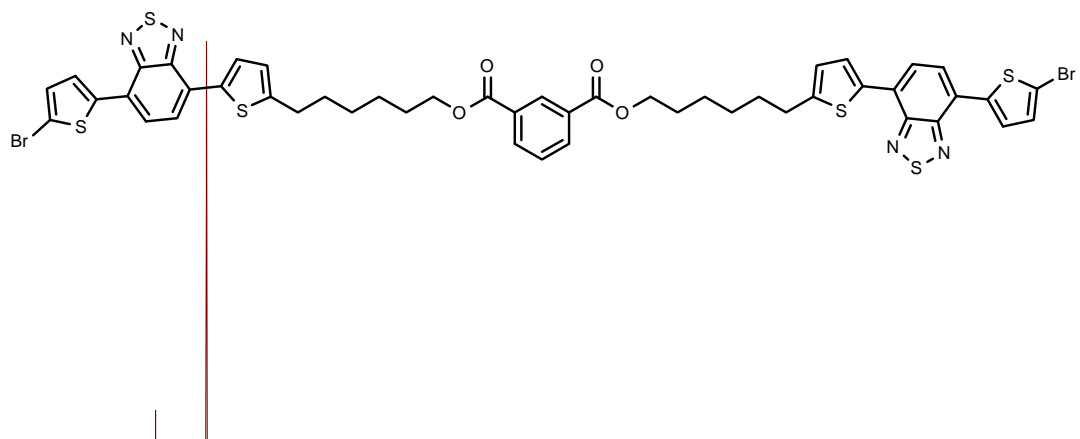

Fig. S7  $^1\text{H}$  NMR spectrum of compound 7 ( $\text{CDCl}_3$ ).

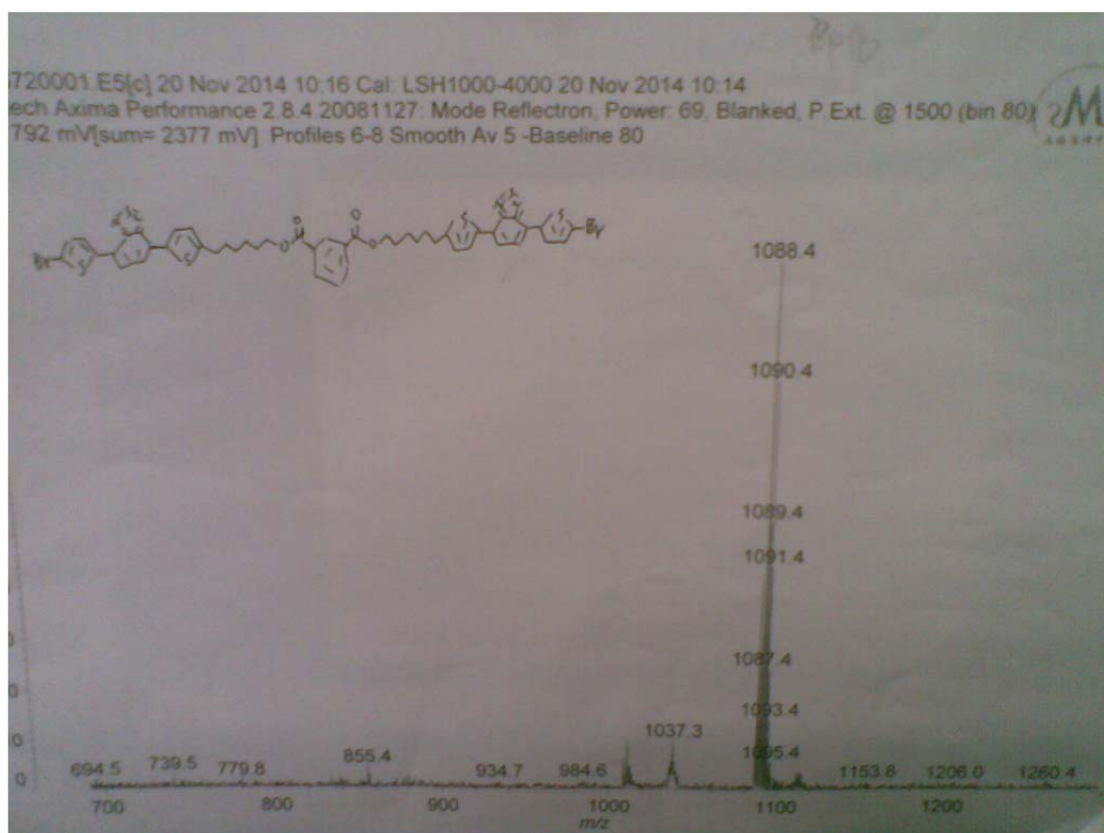

Fig. S8 MALDI-TOF MS of compound 7.

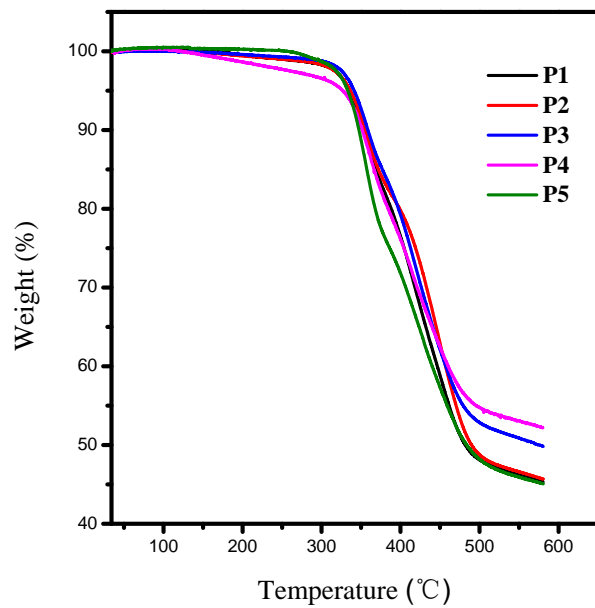

Fig. S9 TGA curves of P1, P2, P3, P4 and P5.

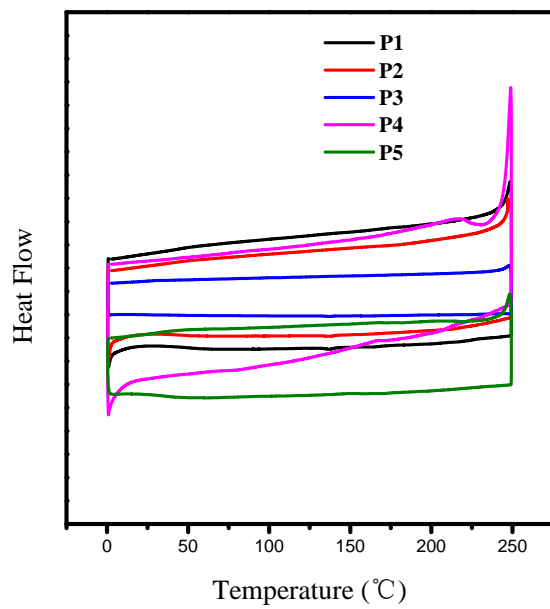

Fig. S10 DSC curves of P1, P2, P3, P4 and P5.

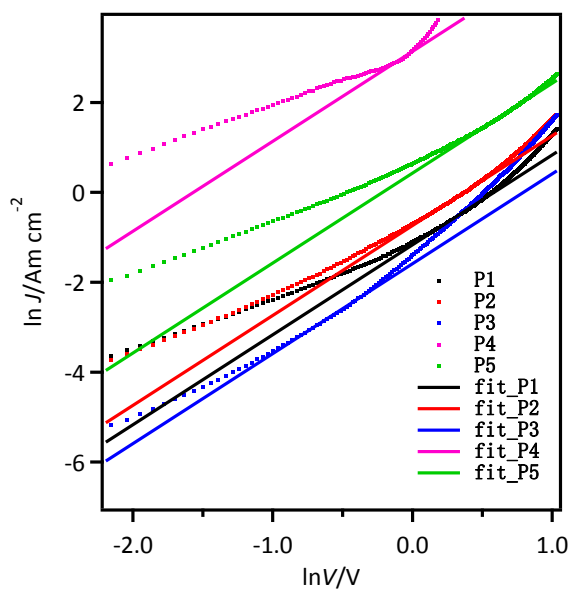

**Fig. S11**  $\ln J$ - $\ln V$  data in dark of hole-only devices based on **P1**, **P2**, **P3**, **P4** and **P5** in blending with  $\text{PC}_{61}\text{BM}$  and their SCLC fitting curves.

**Table S1** Device parameters of **P1**/ $\text{PC}_{61}\text{BM}$ -based solar cells under different conditions.

| Solvent | <b>P1</b> / $\text{PC}_{61}\text{BM}$ | Spin-coating speed (rpm) | Annealing ( $^{\circ}\text{C}$ ) | $V_{\text{oc}}$ (V) | $J_{\text{sc}}$ ( $\text{mA cm}^{-2}$ ) | FF (%) | PCE <sup>a</sup> (%) |             |
|---------|---------------------------------------|--------------------------|----------------------------------|---------------------|-----------------------------------------|--------|----------------------|-------------|
| CB      | 1/1                                   | 1000                     | 100                              | 0.61                | 1.82                                    | 26.9   | 0.30 (0.30)          |             |
|         |                                       | 700                      |                                  | 0.62                | 1.67                                    | 26.6   | 0.28 (0.26)          |             |
|         | 1/1.5                                 | 1000                     |                                  | 0.64                | 2.33                                    | 28.1   | 0.42 (0.41)          |             |
|         |                                       | 1500                     |                                  | 0.72                | 2.21                                    | 29.1   | 0.46 (0.43)          |             |
|         |                                       | 2000                     |                                  | 0.66                | 1.87                                    | 27.4   | 0.34 (0.32)          |             |
|         | 1/2                                   | 1000                     |                                  | 0.72                | 1.59                                    | 28.3   | 0.33 (0.31)          |             |
| o-DCB   | 1/1.5                                 | 1500                     | 60                               | 0.59                | 2.02                                    | 28.6   | 0.34 (0.33)          |             |
|         |                                       |                          | 80                               | 0.65                | 2.03                                    | 28.2   | 0.37 (0.36)          |             |
|         |                                       |                          | 100                              | 0.73                | 2.19                                    | 29.8   | 0.47 (0.44)          |             |
|         |                                       |                          | 120                              | 0.65                | 2.25                                    | 28.5   | 0.42 (0.41)          |             |
| CF      | 1/1.5                                 | 1000                     | 100                              | 0.69                | 1.92                                    | 28.7   | 0.38 (0.37)          |             |
|         |                                       |                          |                                  | 1000                | 0.70                                    | 1.41   | 26.5                 | 0.26 (0.25) |
|         |                                       |                          |                                  | 1500                | 0.70                                    | 2.02   | 29.9                 | 0.42 (0.40) |
|         |                                       | 2500                     |                                  | 0.68                | 2.04                                    | 26.9   | 0.37 (0.35)          |             |

<sup>a</sup> average value of PCE in the parenthesis.

**Table S2** Device parameters of **P2/PC<sub>61</sub>BM**-based solar cells under different conditions.

| Solvent | P2/PC <sub>61</sub> BM | Spin-coating speed (rpm) | Annealing (°C) | V <sub>oc</sub> (V) | J <sub>sc</sub> (mA cm <sup>-2</sup> ) | FF (%)      | PCE <sup>a</sup> (%) |
|---------|------------------------|--------------------------|----------------|---------------------|----------------------------------------|-------------|----------------------|
| o-DCB   | 1/1                    | 1000                     | 100            | 0.68                | 1.43                                   | 26.5        | 0.26 (0.25)          |
|         | 1/1.5                  | 700                      |                | 0.72                | 1.68                                   | 27.2        | 0.33 (0.32)          |
|         |                        | 1000                     |                | 0.75                | 2.04                                   | 27.3        | 0.42 (0.36)          |
|         |                        | 1500                     | 60             | 0.66                | 1.69                                   | 28.3        | 0.32 (0.31)          |
|         |                        |                          | 80             | 0.72                | 1.80                                   | 28.5        | 0.37 (0.35)          |
|         |                        |                          | 100            | 0.76                | 1.99                                   | 33.8        | 0.51 (0.50)          |
|         |                        |                          | 120            | 0.55                | 1.62                                   | 28.8        | 0.26 (0.25)          |
|         |                        | 140                      | 0.43           | 1.81                | 27.0                                   | 0.21 (0.18) |                      |
|         | 2000                   | 100                      | 0.70           | 1.26                | 32.8                                   | 0.29 (0.27) |                      |
|         | 2500                   |                          | 0.58           | 0.95                | 33.5                                   | 0.18 (0.16) |                      |
|         | 1000                   |                          | 0.69           | 1.92                | 28.7                                   | 0.38 (0.37) |                      |
|         | 1/2                    |                          | 0.66           | 2.05                | 28.0                                   | 0.38 (0.36) |                      |
|         | 1/2.5                  |                          | 0.66           | 1.93                | 27.7                                   | 0.36 (0.33) |                      |
|         | CB                     | 1/2                      | 1000           | 0.59                | 1.77                                   | 27.7        | 0.29 (0.26)          |
|         | Toluene                |                          |                | 0.72                | 1.55                                   | 29.1        | 0.32 (0.30)          |
| CF      | 1/1.5                  | 0.77                     |                | 1.30                | 27.7                                   | 0.30 (0.28) |                      |
|         |                        | 0.72                     |                | 2.05                | 28.7                                   | 0.42 (0.41) |                      |
|         |                        | 0.73                     |                | 2.12                | 28.2                                   | 0.44 (0.41) |                      |
|         |                        | 2500                     | 0.66           | 1.92                | 28.1                                   | 0.36 (0.33) |                      |

<sup>a</sup> average value of PCE in the parenthesis.



**Table S3** Device parameters of **P3/PC<sub>61</sub>BM**-based solar cells under different conditions.

| Solvent       | <b>P3/PC<sub>61</sub>BM</b> | Spin-coating speed (rpm) | Annealing (°C) | $V_{oc}$ (V) | $J_{sc}$ (mA cm <sup>-2</sup> ) | FF (%) | PCE <sup>a</sup> (%) |
|---------------|-----------------------------|--------------------------|----------------|--------------|---------------------------------|--------|----------------------|
| CF            | 1/1.5                       | 1000                     | 100            | 0.76         | 1.54                            | 28.9   | 0.34 (0.33)          |
|               |                             | 1500                     |                | 0.74         | 1.49                            | 30.8   | 0.34 (0.28)          |
|               |                             | 2500                     |                | 0.76         | 1.61                            | 27.4   | 0.33 (0.30)          |
| CB            |                             | 1000                     |                | 0.71         | 1.32                            | 30.4   | 0.28 (0.26)          |
|               |                             | 1500                     |                | 0.73         | 1.66                            | 30.0   | 0.36 (0.30)          |
|               |                             | 2500                     |                | 0.70         | 1.49                            | 28.3   | 0.30 (0.27)          |
| <i>o</i> -DCB |                             | 1500                     | RT             | 0.58         | 1.38                            | 26.8   | 0.21 (0.21)          |
|               |                             |                          | 100            | 0.74         | 2.15                            | 28.8   | 0.46 (0.42)          |
|               |                             |                          | 120            | 0.62         | 1.26                            | 27.6   | 0.22 (0.20)          |

<sup>a</sup> average value of PCE in the parenthesis.**Table S4** Device parameters of **P4/PC<sub>61</sub>BM**-based solar cells under different conditions.

| Solvent       | <b>P4/PC<sub>61</sub>BM</b> | Spin-coating speed (rpm) | Annealing (°C) | $V_{oc}$ (V) | $J_{sc}$ (mA cm <sup>-2</sup> ) | FF (%) | PCE <sup>a</sup> (%) |
|---------------|-----------------------------|--------------------------|----------------|--------------|---------------------------------|--------|----------------------|
| <i>o</i> -DCB | 1/1.5                       | 500                      | RT             | 0.67         | 2.22                            | 29.5   | 0.44 (0.40)          |
|               |                             | 1500                     |                | 0.67         | 2.23                            | 33.6   | 0.51 (0.43)          |
|               |                             | 2500                     |                | 0.79         | 2.77                            | 31.6   | 0.69 (0.64)          |

<sup>a</sup> average value of PCE in the parenthesis.

**Table S5** Device parameters of P5/PC<sub>61</sub>BM-based solar cells under different conditions.

| Solvent | P5/PC <sub>61</sub> BM | Spin-coating speed (rpm) | Annealing (°C) | V <sub>oc</sub> (V) | J <sub>sc</sub> (mA cm <sup>-2</sup> ) | FF (%)      | PCE <sup>a</sup> (%) |             |             |
|---------|------------------------|--------------------------|----------------|---------------------|----------------------------------------|-------------|----------------------|-------------|-------------|
| CF      | 3/1                    | 1500                     | RT             | 0.91                | 1.65                                   | 27.4        | 0.41 (0.38)          |             |             |
|         | 2/1                    |                          |                | 0.84                | 2.56                                   | 31.4        | 0.68 (0.52)          |             |             |
|         | 1/1                    |                          |                | 0.84                | 2.40                                   | 35.7        | 0.72 (0.60)          |             |             |
|         |                        |                          | 100            | 0.87                | 2.32                                   | 33.5        | 0.68 (0.66)          |             |             |
|         |                        |                          | 120            | 0.87                | 1.88                                   | 32.0        | 0.53 (0.51)          |             |             |
|         | 1/1.5                  |                          | 1500           | RT                  | 0.85                                   | 2.87        | 34.2                 | 0.84 (0.80) |             |
|         |                        | 1000                     |                |                     | 0.85                                   | 2.64        | 46.5                 | 1.05 (0.93) |             |
|         |                        | 2000                     |                |                     | 0.83                                   | 2.67        | 49.4                 | 1.09 (1.00) |             |
|         |                        | 2500                     |                |                     | 0.88                                   | 2.53        | 41.3                 | 0.92 (0.76) |             |
|         |                        | 1/2                      |                |                     | 1500                                   | 0.87        | 2.12                 | 44.2        | 0.82 (0.72) |
|         |                        |                          |                |                     | 2500                                   | 0.87        | 2.15                 | 50.7        | 0.99 (0.89) |
|         | 4000                   |                          | 0.84           |                     | 2.18                                   | 52.3        | 0.96 (0.72)          |             |             |
| CB      | 1/1.5                  | 1000                     | 0.82           |                     | 2.84                                   | 43.4        | 1.01 (0.99)          |             |             |
|         |                        | 1500                     | 0.82           |                     | 2.85                                   | 41.8        | 0.98 (0.92)          |             |             |
|         |                        | 2500                     | 0.67           |                     | 2.60                                   | 45.1        | 0.79 (0.70)          |             |             |
| o-DCB   | 1/1.5                  | 1000                     | 0.80           |                     | 2.35                                   | 38.5        | 0.72 (0.52)          |             |             |
|         |                        | 1500                     | 0.83           |                     | 2.32                                   | 45.8        | 0.88 (0.82)          |             |             |
|         |                        | 2500                     | 0.87           | 1.74                | 33.8                                   | 0.51 (0.49) |                      |             |             |

<sup>a</sup> average value of PCE in the parenthesis.
